# Supplementary material
Source: PubMed Central journal article supplement (PMC4227834)
Supplement: ja5039227_si_001.pdf [file ja5039227_si_001.pdf]

# Isomorphous emissive GTP surrogate facilitates initiation and elongation of in vitro transcription reactions

Lisa S. McCoy, Dongwon Shin, Yitzhak Tor\*

Department of Chemistry and Biochemistry, University of California, San Diego, La Jolla, California 92093-0358, United States

## Table of Contents

|                                                                                                                                               |    |
|-----------------------------------------------------------------------------------------------------------------------------------------------|----|
| <b>Figure S.1:</b> ESI-MS deconvoluted mass spectra of RNA transcripts <b>4</b> , <b>5</b> , S, <sup>th</sup> G-S, E. <sup>th</sup> G-E. .... | S2 |
| <b>Figure S.2:</b> ESI-MS mass over charge (m/z) and deconvoluted spectra of <sup>th</sup> G-E. ....                                          | S3 |
| <b>Figure S.3:</b> Digestions of RNA transcripts <b>4</b> , <b>5</b> , S, <sup>th</sup> G-S, E. <sup>th</sup> G-E. ....                       | S4 |
| <b>Figure S.4:</b> Large scale transcription reactions using templates <b>6</b> and <b>7</b> . ....                                           | S5 |
| <b>Figure S.5:</b> Light and darker contrast images of higher temperature HH ribozyme cleavage reactions ...                                  | S6 |
| <b>Figure S.6:</b> Absorption and emission spectra of single strands <sup>th</sup> G-S and <sup>th</sup> G-E. ....                            | S6 |
| <b>Figure S.7:</b> Comparison of normalized fluorescence and radioactive ribozyme cleavage data for <sup>th</sup> G-S and E. ....             | S7 |
| <b>Figure S.8:</b> PAGE analysis confirming two fluorescent products <sup>th</sup> G-P <sub>1</sub> and <sup>th</sup> G-P <sub>2</sub> . .... | S7 |
| <b>Figure S.9:</b> Large scale transcription reaction of riboswitch pbuE. ....                                                                | S8 |
| <b>Figure S10:</b> Digestion of RNA transcripts pbuE and <sup>th</sup> G-pbuE. ....                                                           | S9 |

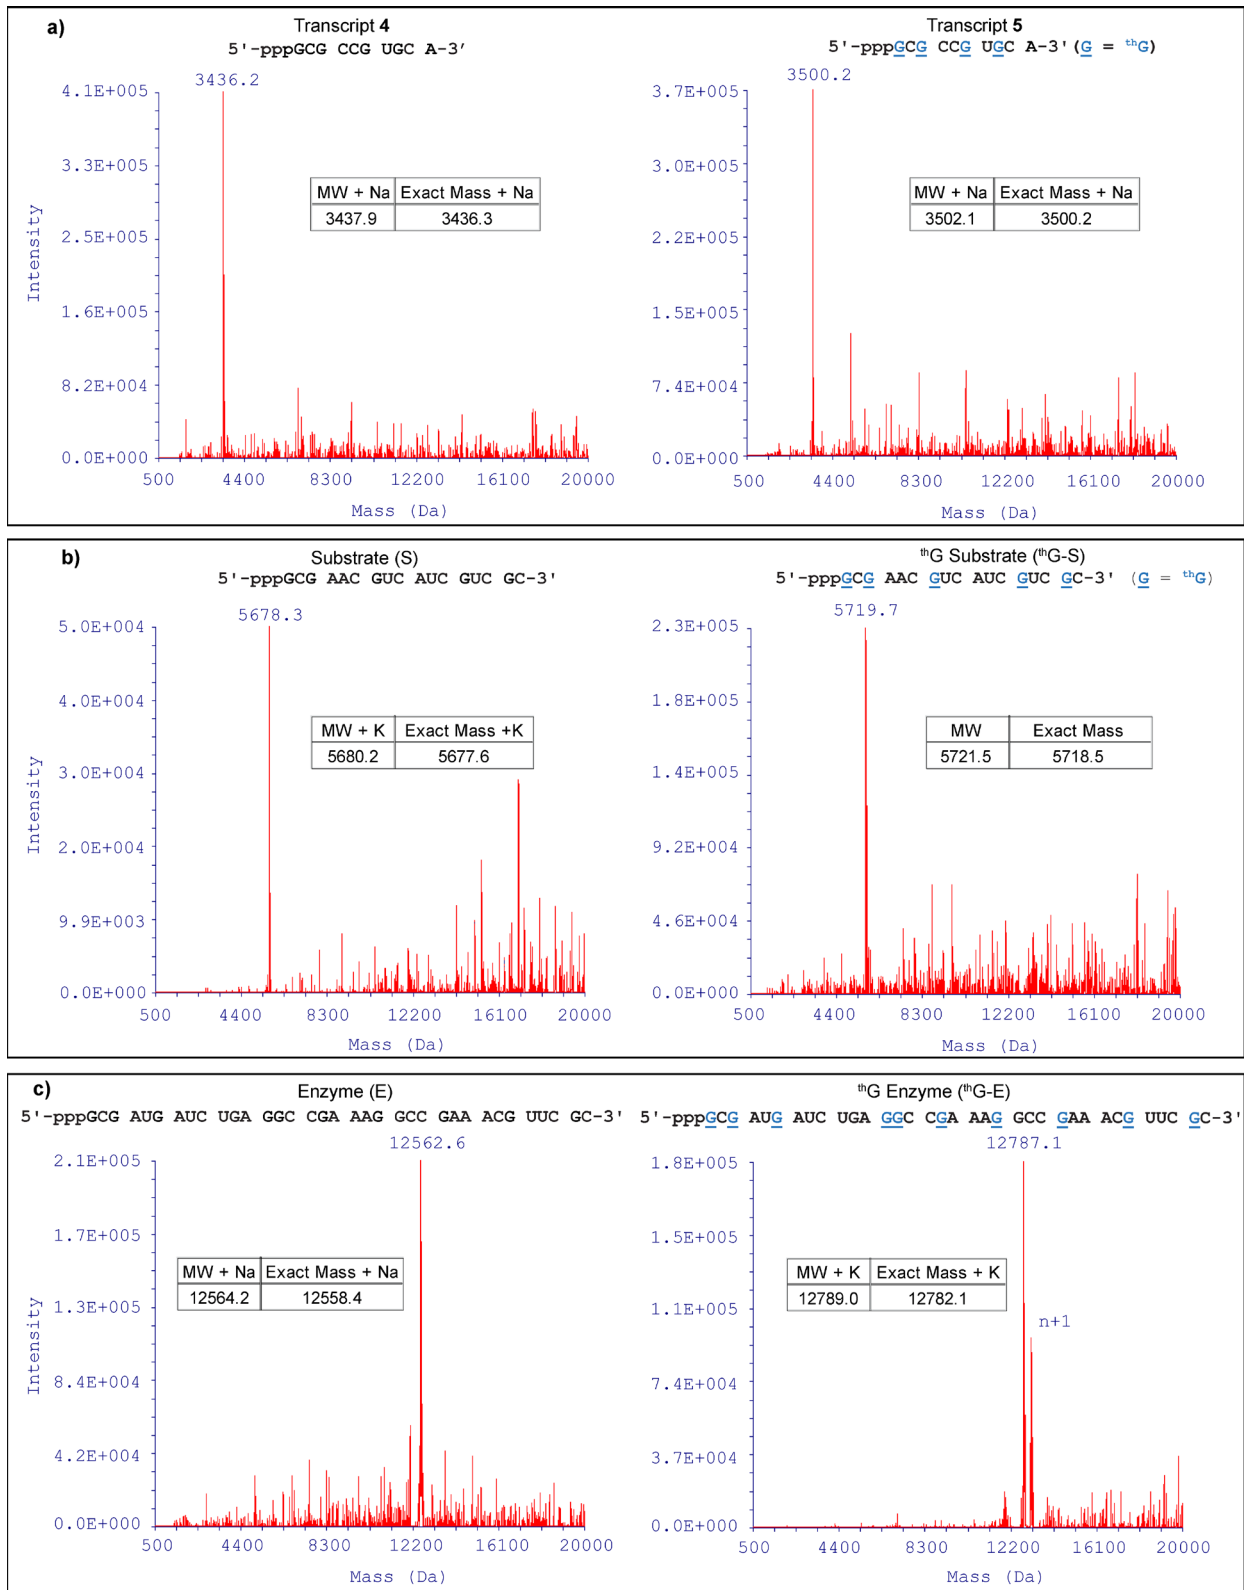

**Figure S1:** ESI-MS deconvolution mass results of a) transcripts 4 and 5, b) S and <sup>13</sup>G-S and c) E and <sup>13</sup>G-E.

<sup>3</sup>H-G Enzyme (<sup>3</sup>H-G-E)  
 5' -pppGCG AUG AUC UGA GGC CGA AAG GCC GAA ACG UUC GC-3'

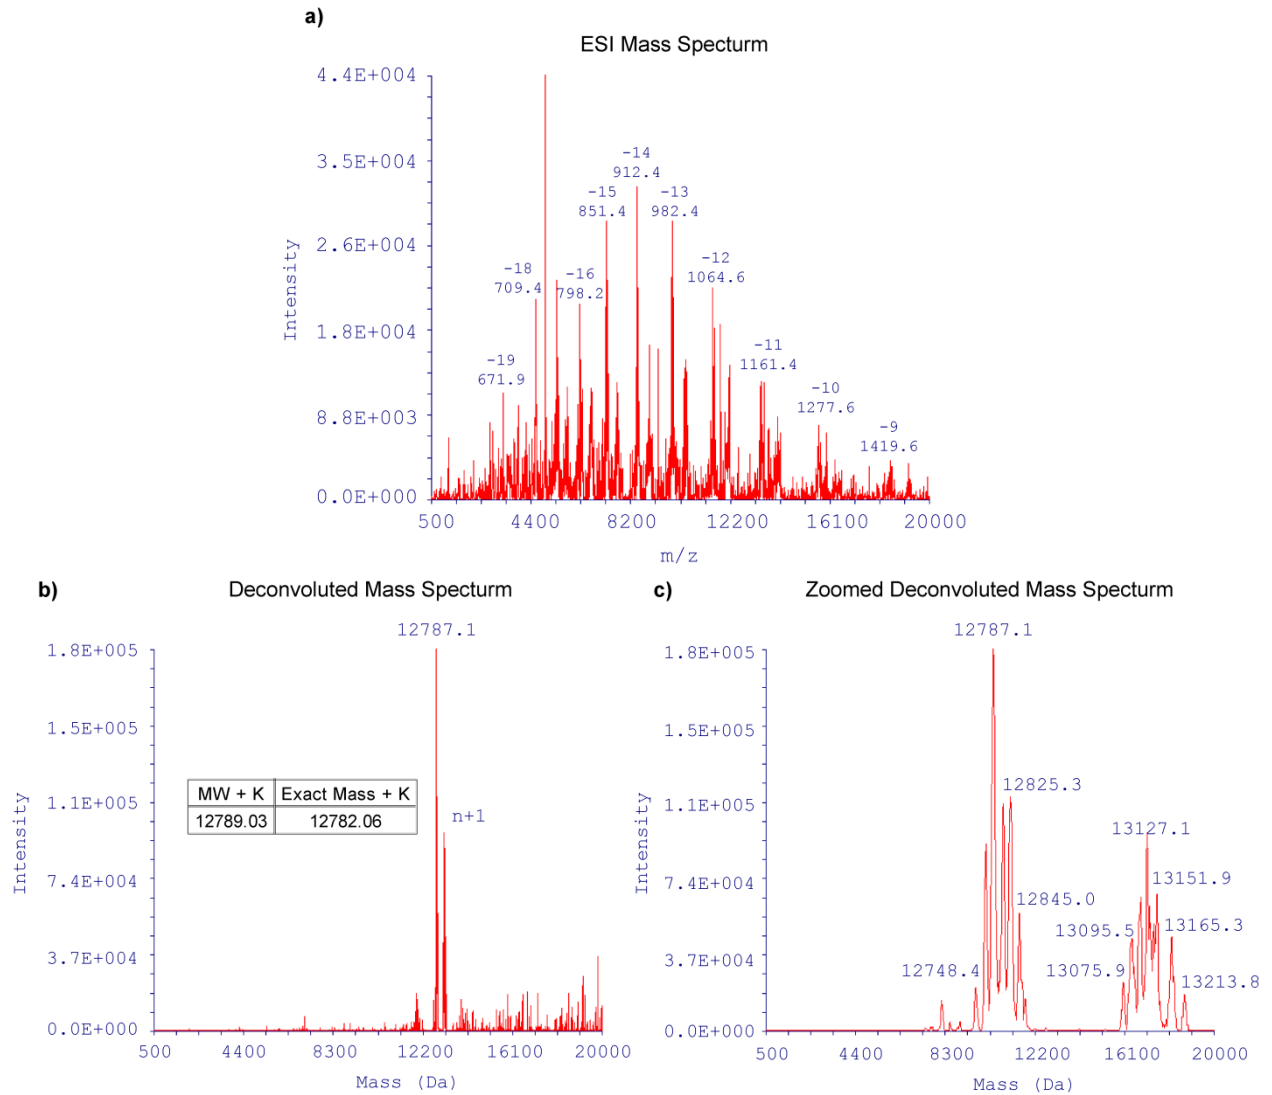

**Figure S2:** ESI-MS showing (a) mass over charge ( $m/z$ ), b) deconvoluted and c) zoomed deconvoluted spectra.

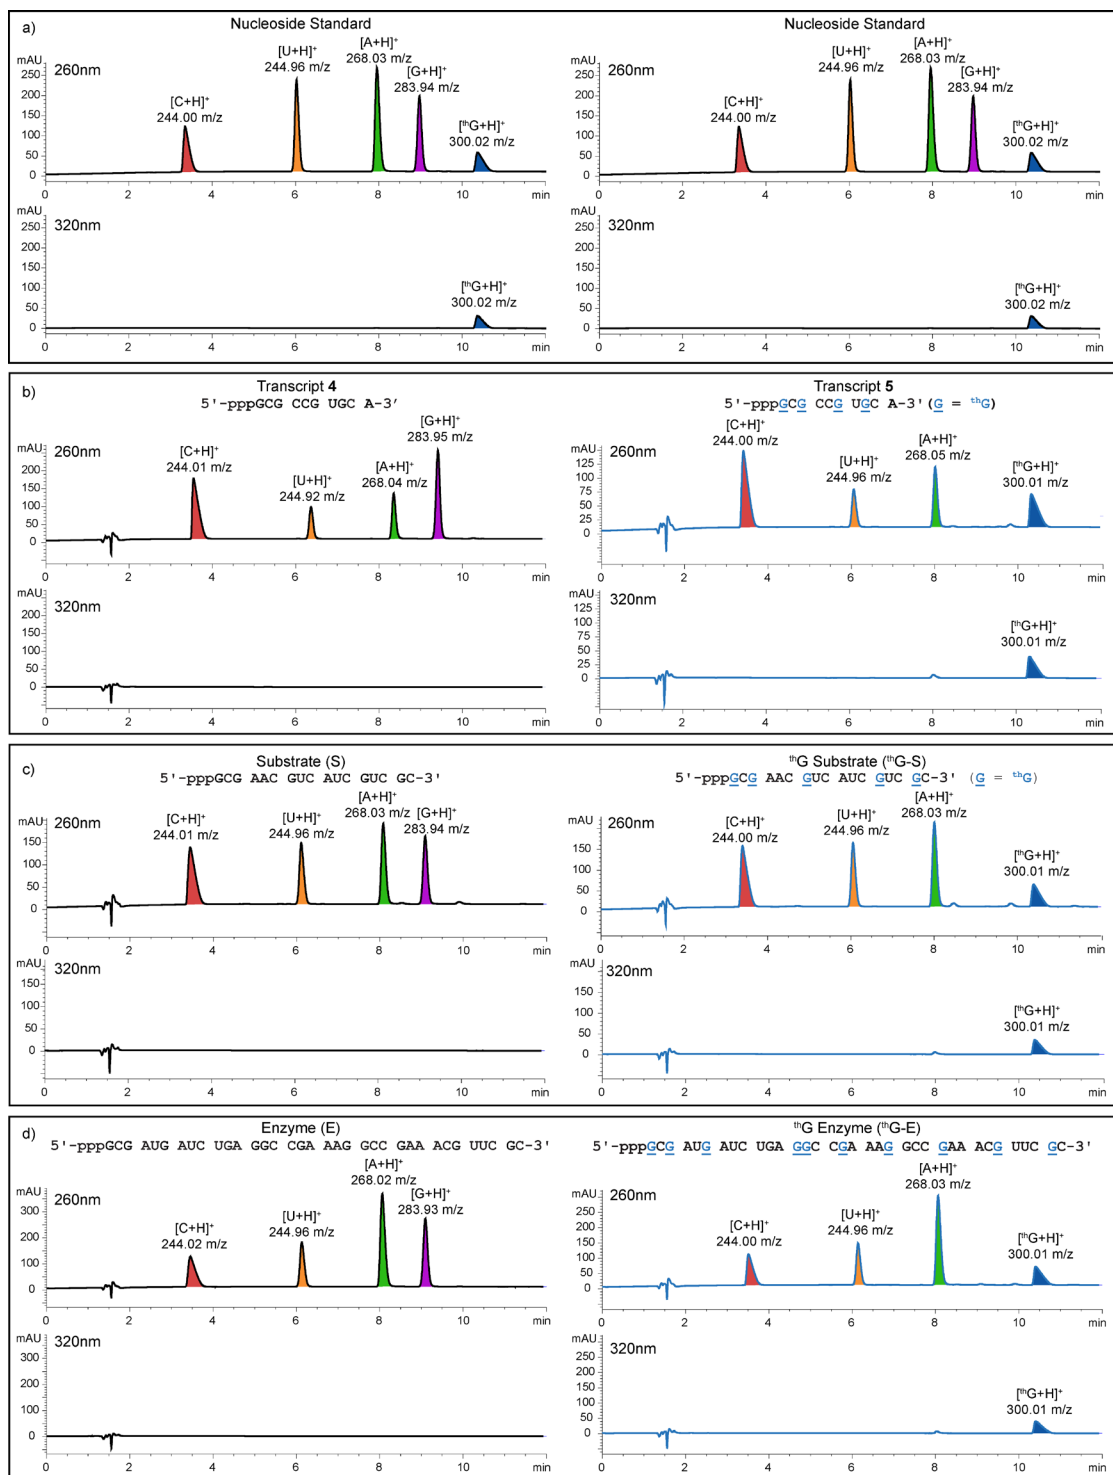

**Figure S3:** a) The mixture of nucleosides used as a standard. This is shown in both panels to compare to the natural and modified transcripts. Digestion results of b) transcript 4 and 5, c) S and <sup>th</sup>G-S, and d) E and <sup>th</sup>G-E. Digestion of 0.5-2 nmol of transcript was carried out using S1 nuclease for two hours at 37 °C, and was followed by dephosphorylation with alkaline phosphatase for two hours at 37°C. The ribonucleoside mixture obtained was analyzed by reverse-phase analytical HPLC, using a mobile phase of 0–6% acetonitrile (0.1% formic acid) in water (0.1% formic acid) over 12 min; flow rate 1 mL/min. Detection wavelengths are listed.

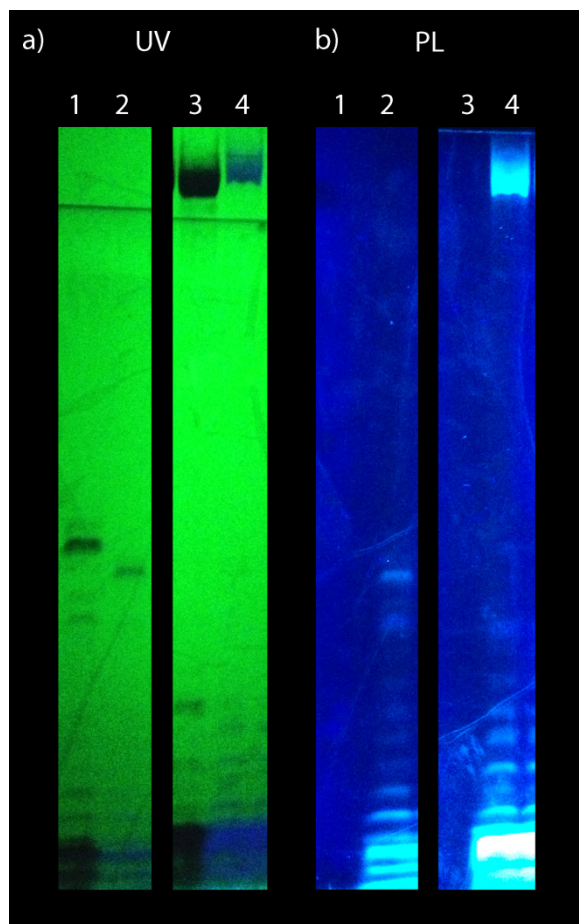

**Figure S4:** Gel of large scale transcription reactions using templates **6** and **7** with all natural NTPs (lane 1 and 3) or ATP, UTP, CTP and  $^{3}\text{H}$ GTP (lane 2 and 4) with UV light at a) 254 nm (on TLC plate) and b) 302 nm (PL). The reaction was resolved by gel electrophoresis on a denaturing 15% polyacrylamide gel. The isolated yields for  $^{3}\text{H}$ G-S compared to S was  $61\pm 3\%$  (or  $53\pm 13\%$ ), with an average  $^{3}\text{H}$ GTP incorporation of  $91\pm 1\%$  (or  $88\pm 2\%$ ). The isolated yields for  $^{3}\text{H}$ G-E compared to E was  $28\pm 2\%$ , with an average of each of the thirteen  $^{3}\text{H}$ GTP incorporations was  $91\pm 1\%$ .

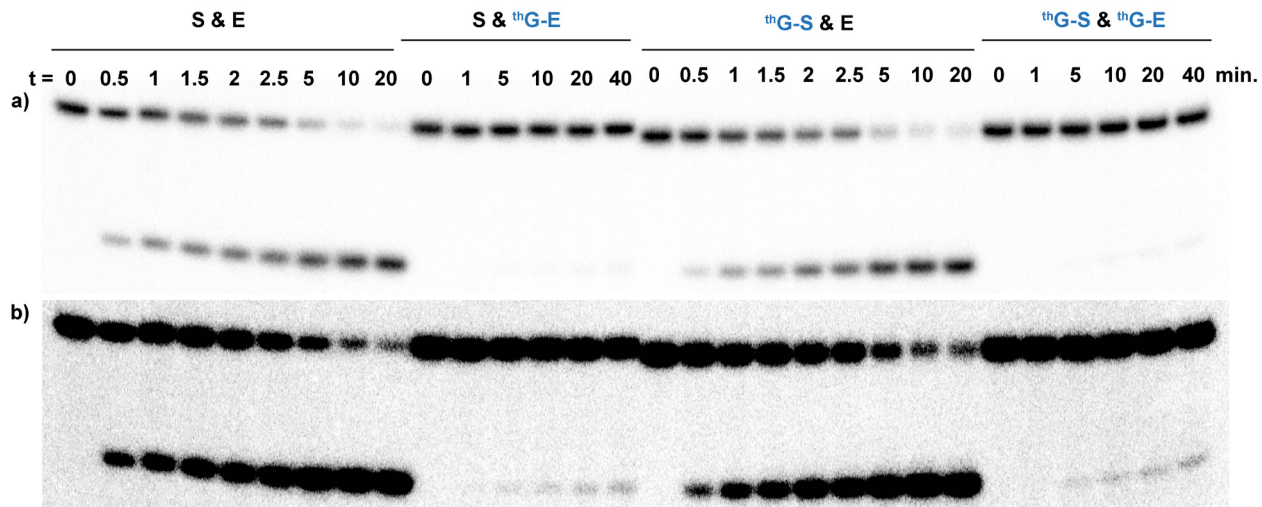

**Figure S5:** a) Light and b) darker contrast images of HH ribozyme cleavage reactions results were followed by  $^{32}\text{P}$  radioactive labeling of substrate strands S and  $^{\text{th}}\text{G-S}$ . S and  $\text{P}_1$ , and  $^{\text{th}}\text{G-S}$  and  $^{\text{th}}\text{G-P}_1$  indicate substrate and product strands. All reactions were conducted at 37 °C and contained 0.3  $\mu\text{M}$  substrate (including a trace of 5'- $^{32}\text{P}$  labeled material), 3  $\mu\text{M}$  enzyme, 50 mM Tris pH 7.0, 200 mM NaCl, and 10 mM  $\text{MgCl}_2$ . Cleavage for S and  $^{\text{th}}\text{G-S}$  by  $^{\text{th}}\text{G-E}$  was estimated at around 2% at 40 min.

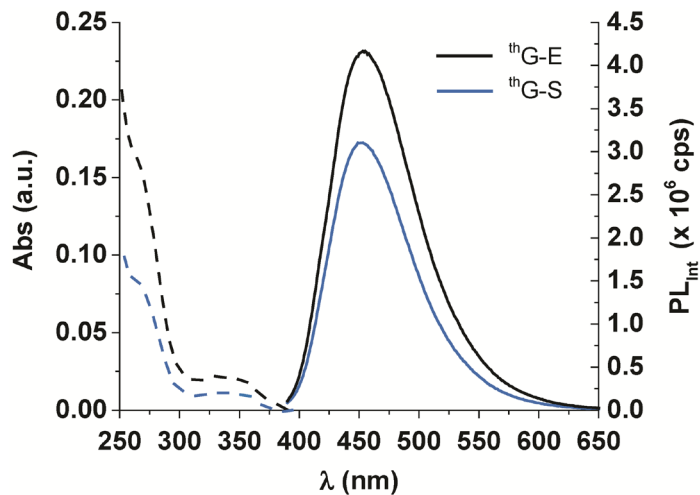

**Figure S6:** Absorption (dotted) and emission (solid) spectra of 0.6  $\mu\text{M}$  of  $^{\text{th}}\text{G-S}$  (blue) and  $^{\text{th}}\text{G-E}$  (black) in 50 mM Tris pH 7.0 and 200 mM NaCl. The excitation wavelength was 470 nm and emission was recorded from 390–650 nm. Slit widths for excitation and emission were 8 nm.

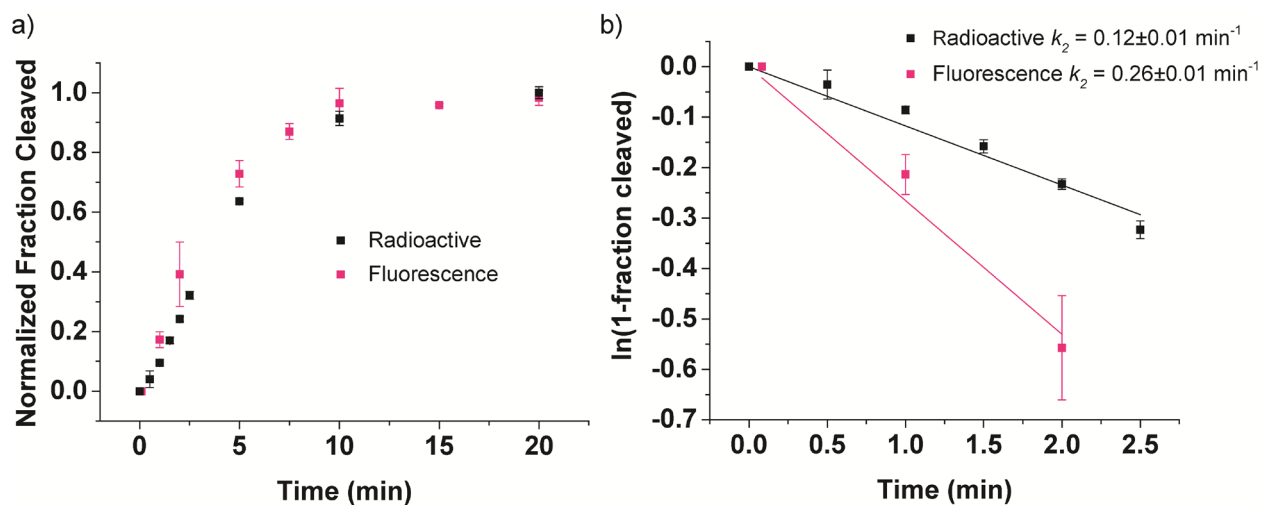

**Figure S7:** Comparison of fluorescence and radioactive experiment data for  $^{3}\text{H}$ -G-S and E, including a) normalized fraction cleavage detected by radioactive experiments or normalized intensity at 450 nm for the fluorescence experiments and b) rates.

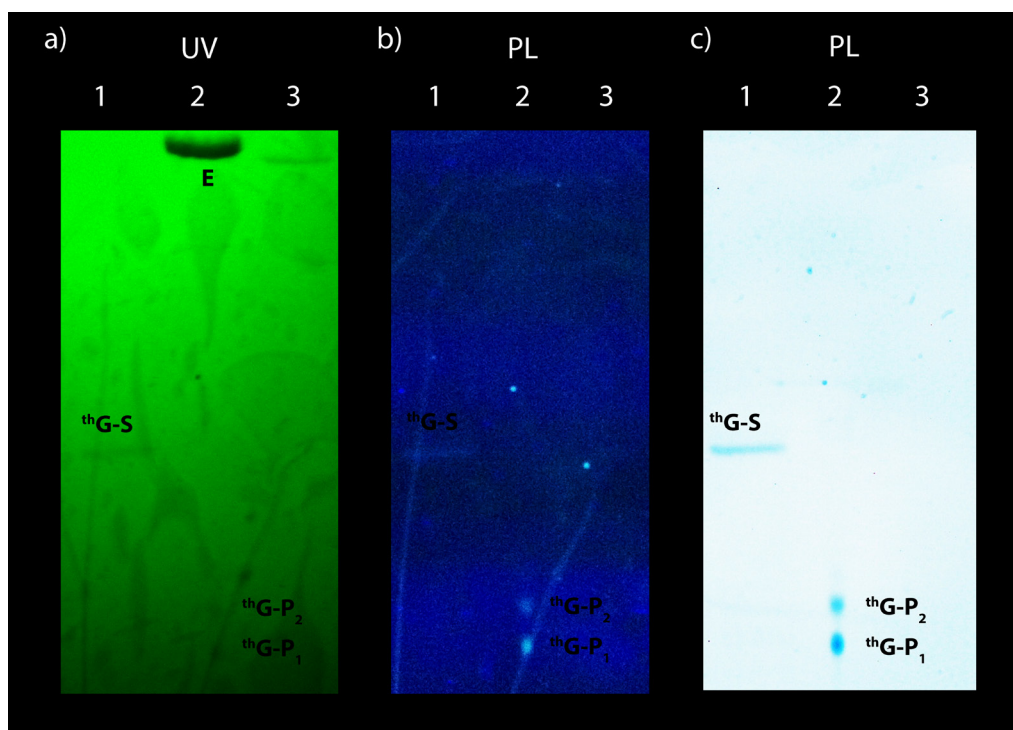

**Figure S8:** Lane 1 is  $^{3}\text{H}$ -G-S, lane 2 is the cleavage reaction of  $^{3}\text{H}$ -G-S & E after 20 minutes, and lane 3 is E. The reaction was conducted at 31 °C in a micro fluorescence cell (125  $\mu\text{L}$ ) and contained 0.3  $\mu\text{M}$   $^{3}\text{H}$ -G-S, 3  $\mu\text{M}$  E, 50 mM Tris pH 7.0, 200 mM NaCl, and 10 mM  $\text{MgCl}_2$ . The reaction was resolved by gel electrophoresis on a denaturing 20% polyacrylamide gel and imaged with a) UV light at 254 nm (on TLC plate), b) 302 nm (PL), and c) in a BioRad gel imaging system with 302 nm (PL).

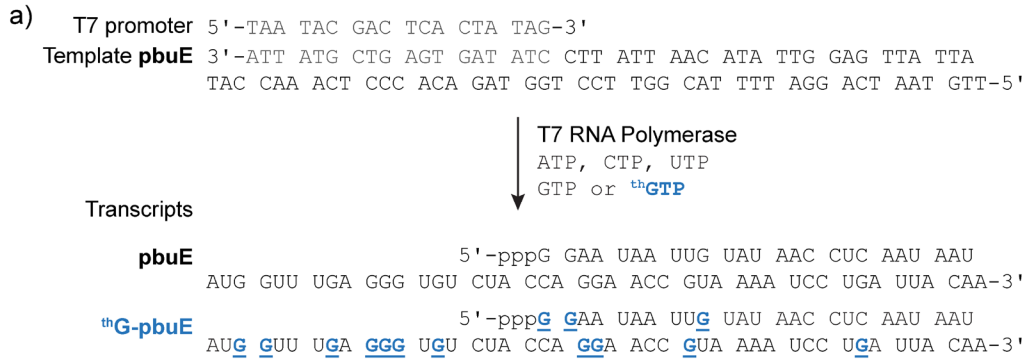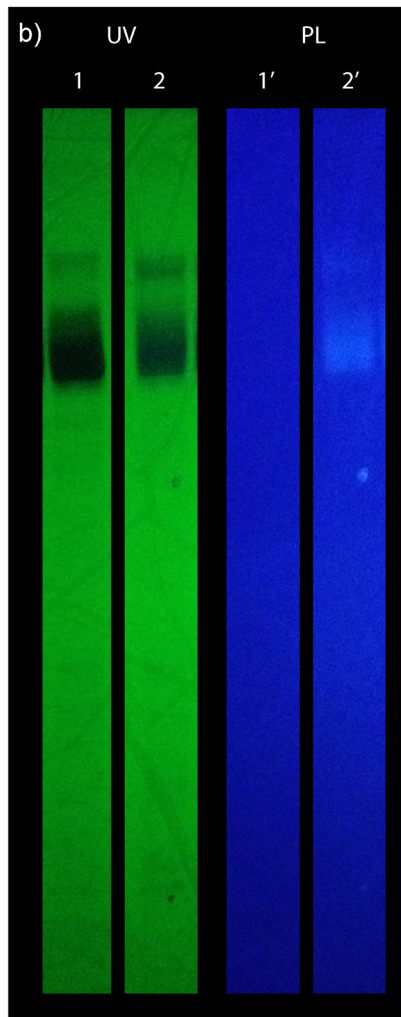

Figure S9: a) T7 promoter and template pbuE depicting the enzymatic incorporation reaction using natural NTPs and GTP or <sup>th</sup>GTP resulting in transcripts pbuE or <sup>th</sup>G-pbuE. <sup>th</sup>G is underlined and bolded blue in transcript <sup>th</sup>G-pbuE. b) Large scale transcription reaction using template pbuE with all natural NTPs (lane 1 and 1') or ATP, UTP, CTP and <sup>th</sup>GTP (lanes 2 and 2') with UV light at 254 nm (on TLC plate) and 302 nm (PL). The reaction was resolved by gel electrophoresis on a denaturing 8% polyacrylamide gel. The isolated yields for <sup>th</sup>G-pbuE compared to pbuE was 54%, with an average of each of the fourteen <sup>th</sup>GTP incorporations was 95%.



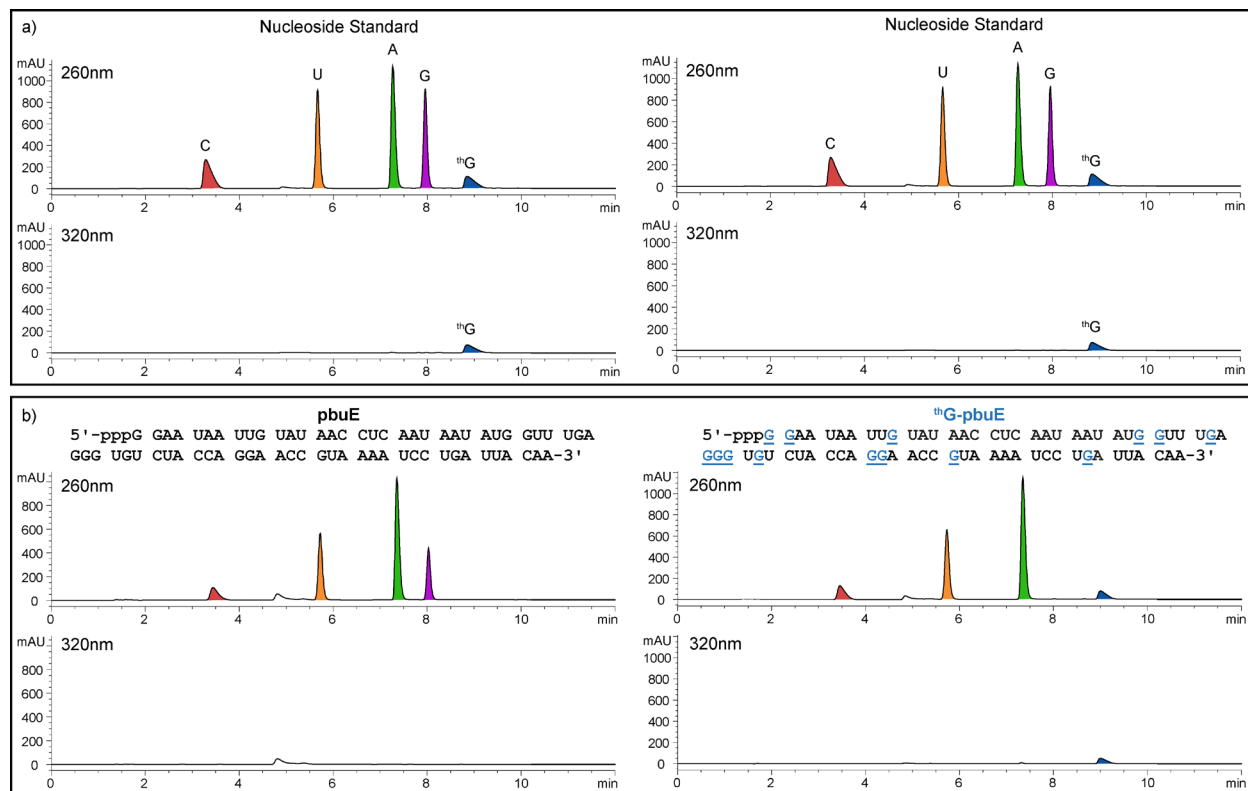

Figure S10: a) The mixture of nucleosides used as a standard. This is shown in both panels to compare to the natural and modified transcripts. b) Digestion results of transcript pbuE and <sup>3</sup>H-pbuE. Digestion of 0.3 nmol of transcript was carried out using S1 nuclease for two hours at 37 °C, and was followed by dephosphorylation with alkaline phosphatase for two hours at 37°C. The ribonucleoside mixture obtained was analyzed by reverse-phase analytical HPLC, using a mobile phase of 0-5% acetonitrile (0.1% formic acid) in water (0.1% formic acid) over 10 min; flow rate 1 mL/min. Detection wavelengths are listed.
